# Supplementary material
Source: PubMed Central journal article supplement (PMC10191414)
Supplement: NIHMS1893448-supplement-Appendix.pdf [file NIHMS1893448-supplement-Appendix.pdf]

## Appendix Exhibit A1. Food Groups

| <b>Food Group</b>                                                    | <b>Example Products</b>                                                                                   |
|----------------------------------------------------------------------|-----------------------------------------------------------------------------------------------------------|
| Candy, Chocolate, & Gum                                              | Milk Chocolate Chips, Chocolate Truffles, Gummy Worms, Spearmint Gum                                      |
| Desserts & Sweet Snacks                                              | Cake Mix, Refrigerated Cookie Dough, Ice Cream, Mini Donuts                                               |
| Fruits, Vegetables, Nuts, & Legumes                                  | Strawberries, Cauliflower, Canned Diced Tomatoes, Frozen Edamame, Dry Roasted Peanuts, Canned Baked Beans |
| Fruits, Vegetables, Nuts, & Legumes w/No Added Sugar, Fat or Sodium* | Blueberries, Russet Potatoes, Canned Whole Kernel Corn, Pinto Beans                                       |
| Processed Meats & Processed Seafood                                  | Beef Franks, Bologna, Canned Tuna, Sausage Links, Honey Ham                                               |
| Salty Snacks                                                         | Potato Chips, Cheddar Popcorn, Peanut Butter Crackers, Pork Skins, Pretzel Sticks                         |
| Sugar-Sweetened Beverages                                            | Fruit Punch, Cola (regular), Lemonade, Ginger Ale, Root Beer, Margarita Mix                               |
| Sweeteners & Toppings                                                | Dark Brown Sugar, Light Corn Syrup, Chocolate Syrup, Stevia, Vanilla Frosting                             |

Source: Transaction data from a supermarket chain in North Carolina, October 2019 to December 2020, linked to nutrition facts panel data by barcode.

Notes: Fruits, Vegetables, Nuts, & Legumes with No Added Sugar, Fat, or Sodium (FVNLNA) is a sub-category of Fruits, Vegetables, Nuts & Legumes (FVNL). Fruits and vegetables in the FVNLNA group meet the WIC-nutritional standards to be allowed for the WIC Cash Value Benefit and were eligible for purchase with the Healthy Helping fruit and vegetable incentive. Less healthy categories were selected based on product categories that are over-consumed in the U.S. (1) and contribute substantially to total energy, saturated fat, sodium, and sugar in the U.S. diet (2).

## **Appendix Exhibit A2. Healthy Helping Program Outreach, Recruitment, and Screening**

In May 2022, Reinvestment Partners received \$2.5 million allocated by the North Carolina General Assembly (see page 14, item 37 of NC House Bill 1043 (3)) from federal CARES Act funds, which needed to be spent by December 31, 2020. The intent was to enroll as many eligible individuals as possible, within the time and budgetary constraints. Enrollment began in late-June 2020, but most individuals were enrolled in September and October, after recruitment efforts ramped up and word about the program spread.

### Outreach & Recruitment:

- 1) 47 NC Division of Social Services (DSS) county offices and Federally Qualified Health Clinics in North Carolina were able to enroll eligible constituents and patients.
- 2) COVID-19 Help Hotline: Community Care of North Carolina (CCNC) had a contract with the NC Department of Health and Human Services (DHHS) to offer a COVID hotline, available to anyone affected by COVID-19 and in need of assistance. Hotline operators were able to screen and enroll eligible individuals.
- 3) Mass Media: The hotline was promoted by NC DHHS. Healthy Helping was the subject of news coverage and local government outreach. Awareness of the Healthy Helping also spread through word-of-mouth and social media.
  - a. Ex. 1: <https://spectrumlocalnews.com/nc/charlotte/news/2020/09/01/healthy-helping-aids-snap-recipients-in-buying-more-fruits-and-vegetables>
  - b. Ex. 2: <https://www.the-dispatch.com/story/news/2020/08/28/healthy-helping-produce-program-three-month-benefit/5650061002/>
  - c. Ex. 3: <https://www.brunswickcountync.gov/healthy-helping-program-8-20/>

### Screening:

Program eligibility was assessed via two screener questions:

- 1) Are you a SNAP recipient?
- 2) Have you been negatively affected by COVID-19?

### **Appendix Exhibit A3. Propensity Score Variables**

Covariates used to generate propensity scores:

Index month, amount of pre-index follow-up time, top store (based on frequency of purchases), number of shopping trips, number of shopping trips using SNAP, percentage of purchases including a coupon, number of tender types used, percentage of purchases using cash, percentage of purchases using a credit card, percentage of purchases using a debit card, percentage of purchases using SNAP benefits, percentage of purchases using WIC benefits, WIC use (any WIC spending in prior 3 months), total calories (kcal) purchased, calories from Candy, Chocolate, and Gum (CCG), calories from Desserts and Sweet Snacks (DSS), calories from Fruits, Vegetables, Nuts, & Legumes (FVNL), calories from Fruits, Vegetables, Nuts, & Legumes with No Added Sugar, Sodium or Fat (FVNLNA), calories from Processed Meats and Seafood (PMS), calories from Salty Snacks (SAS), calories from Sugar-Sweetened Beverages (SSB), calories from Sweeteners and Toppings (ST), total expenditure (\$), total expenditure on food and beverages, dollars spent on CCG, dollars spent on DSS, dollars spent on FVNL, dollars spent on FVNLNA, dollars spent on PMS, dollars spent on SAS, dollars spent on SSB, dollars spent on ST, percentage of CCG spending (\$) with no nutrient data, percentage of DSS spending with no nutrient data, percentage of FVNL spending with no nutrient data, percentage of FVNLNA spending with no nutrient data, percentage of PMS spending with no nutrient data, percentage of SAS spending with no nutrient data, percentage of SSB spending with no nutrient data, percentage of ST spending with no nutrient data, volume (oz) purchased of CCG, volume (oz) purchased of DSS, volume (oz) purchased of FVNL, volume (oz) purchased of FVNLNA, volume (oz) purchased of PMS, volume (oz) purchased of SAS, volume (oz) purchased of SSB, volume (oz) purchased of ST, percentage of calories from carbohydrates, percentage of calories from protein, percentage of calories from saturated fat, percentage of calories from sugar, percentage of calories from total fat, ratio of fiber (g) to carbs (g), ratio of fiber (g) to total calories (kcal), and ratio of sodium (mg) to total calories (kcal).

Note: The variables listed were included in a logistic regression estimating the probability of enrollment in Healthy Helping (the treatment), based on pre-index purchase data only, with standard errors clustered at shopper ID level, which was used to generate propensity scores.

Abbreviations: SNAP, Supplemental Nutrition Assistance Program; WIC, Special Supplemental Nutrition Program for Women, Infants, and Children

**Appendix Exhibit A4. Purchasing Behavior before the Implementation of a Fruit and Vegetable Incentive Program at a Supermarket Chain in North Carolina**

| Variable                                                                      | Overall<br>N=105,756 | Unweighted          |                    |        | Weighted            |                    |
|-------------------------------------------------------------------------------|----------------------|---------------------|--------------------|--------|---------------------|--------------------|
|                                                                               |                      | Control<br>N=86,034 | HH<br>N=19,722     | P      | Control<br>N=86,034 | HH<br>N=19,722     |
|                                                                               | Mean (SD)            | Mean<br>(SD)        | Mean<br>(SD)       |        | Mean<br>(SD)        | Mean<br>(SD)       |
| All Spending (\$/month)                                                       | 217.23<br>(187.87)   | 221.51<br>(189.80)  | 200.61<br>(179.19) | <0.001 | 203.24<br>(172.82)  | 203.24<br>(182.67) |
| Food and Beverage (\$/month)                                                  | 192.64<br>(166.34)   | 195.81<br>(167.58)  | 180.32<br>(160.85) | <0.001 | 182.36<br>(155.56)  | 182.36<br>(163.74) |
| Fruits, Vegetables, Nuts, & Legumes (\$/month)                                | 23.00<br>(24.20)     | 23.27<br>(24.47)    | 21.98<br>(23.10)   | <0.001 | 22.02<br>(23.21)    | 22.02<br>(23.25)   |
| Fruits, Vegetables, Nuts, & Legumes w/No Added Sugar, Salt, or Fat (\$/month) | 18.09<br>(20.36)     | 18.26<br>(20.58)    | 17.43<br>(19.47)   | <0.001 | 17.41<br>(19.70)    | 17.41<br>(19.53)   |
| Candy, Chocolate & Gum (\$/month)                                             | 2.63<br>(4.99)       | 2.67<br>(5.02)      | 2.48<br>(4.86)     | <0.001 | 2.50<br>(4.82)      | 2.50<br>(4.89)     |
| Dessert & Sweet Snacks (\$/month)                                             | 16.52<br>(18.64)     | 16.79<br>(18.81)    | 15.46<br>(17.92)   | <0.001 | 15.61<br>(17.77)    | 15.61<br>(18.12)   |
| Processed Meats & Seafood (\$/month)                                          | 16.58<br>(19.46)     | 16.75<br>(19.59)    | 15.92<br>(18.96)   | <0.001 | 15.98<br>(18.88)    | 15.98<br>(19.07)   |
| Salty Snacks (\$/month)                                                       | 10.75<br>(13.68)     | 10.95<br>(13.80)    | 9.97<br>(13.17)    | <0.001 | 10.10<br>(12.91)    | 10.10<br>(13.36)   |
| Sugar-Sweetened Beverages (\$/month)                                          | 22.31<br>(27.72)     | 22.71<br>(27.95)    | 20.76<br>(26.71)   | <0.001 | 20.96<br>(26.25)    | 20.96<br>(26.97)   |
| Sweeteners & Toppings (\$/month)                                              | 1.71<br>(3.25)       | 1.72<br>(3.26)      | 1.69<br>(3.22)     | 0.114  | 1.68<br>(3.23)      | 1.68<br>(3.20)     |
| Total Energy (kcal) Purchased                                                 | 56,858<br>(51,432)   | 57,408<br>(51,637)  | 54,720<br>(50,569) | <0.001 | 54,958<br>(49,556)  | 54,958<br>(51,095) |
| % Energy from Carbohydrates                                                   | 55.41<br>(16.30)     | 55.49<br>(16.15)    | 55.12<br>(16.86)   | <0.001 | 55.21<br>(16.51)    | 55.21<br>(16.80)   |
| % Energy from Protein                                                         | 9.28<br>(4.27)       | 9.31<br>(4.23)      | 9.18<br>(4.43)     | <0.001 | 9.23<br>(4.25)      | 9.23<br>(4.46)     |
| % Energy from Saturated Fat                                                   | 11.87<br>(5.20)      | 11.90<br>(5.17)     | 11.79<br>(5.32)    | <0.001 | 11.81<br>(5.15)     | 11.81<br>(5.35)    |
| % Energy from Sugar                                                           | 30.97<br>(17.33)     | 31.00<br>(17.27)    | 30.81<br>(17.53)   | 0.035  | 30.83<br>(17.37)    | 30.83<br>(17.56)   |
| % Energy from Total Fat                                                       | 36.98<br>(14.72)     | 36.86<br>(14.55)    | 37.44<br>(15.37)   | <0.001 | 37.28<br>(15.06)    | 37.28<br>(15.26)   |

|                                  |                  |                  |                  |        |                  |                  |
|----------------------------------|------------------|------------------|------------------|--------|------------------|------------------|
| Fiber (g) to Carb (g) Ratio      | 0.05<br>(0.03)   | 0.04<br>(0.03)   | 0.05<br>(0.03)   | <0.001 | 0.05<br>(0.03)   | 0.05<br>(0.03)   |
| Fiber (g) per 1000 kcal          | 5.98<br>(4.73)   | 5.96<br>(4.63)   | 6.07<br>(5.11)   | <0.001 | 6.04<br>(5.04)   | 6.04<br>(5.02)   |
| Sodium (mg) per 1000 kcal        | 1.82<br>(3.22)   | 1.82<br>(3.15)   | 1.85<br>(3.45)   | 0.006  | 1.84<br>(3.64)   | 1.84<br>(3.30)   |
| No. Pre-index Months             | 8.45<br>(3.03)   | 8.31<br>(3.07)   | 8.96<br>(2.80)   | <0.001 | 8.84<br>(2.85)   | 8.84<br>(2.87)   |
| No. Transactions                 | 5.28<br>(4.03)   | 5.30<br>(4.02)   | 5.17<br>(4.06)   | <0.001 | 5.15<br>(3.95)   | 5.15<br>(4.05)   |
| Transactions Inc. >1 Tender Type | 1.37<br>(1.76)   | 1.34<br>(1.72)   | 1.49<br>(1.89)   | <0.001 | 1.45<br>(1.85)   | 1.45<br>(1.83)   |
| Coupons (% Transactions)         | 2.09<br>(5.32)   | 1.99<br>(5.08)   | 2.47<br>(6.13)   | <0.001 | 2.31<br>(6.25)   | 2.31<br>(5.56)   |
| No. SNAP Episodes                | 2.33<br>(2.51)   | 2.23<br>(2.45)   | 2.71<br>(2.71)   | <0.001 | 2.59<br>(2.69)   | 2.59<br>(2.61)   |
| WIC Use (Past 3 Months)          | 11.72<br>(32.16) | 11.34<br>(31.71) | 13.17<br>(33.82) | <0.001 | 12.82<br>(33.43) | 12.82<br>(33.43) |

Source: Authors' analysis of data from a supermarket chain in North Carolina, October 2019 to December 2020.

Notes: Estimates represent the shopper-month means and standard deviations during the pre-index period. P-values were obtained from bivariate generalized estimating equations, clustered at the shopper ID-level to account for repeated measurements.

Abbreviations: HH = Healthy Helping; SD = Standard Deviation; SNAP = Supplemental Nutrition Assistance Program; WIC = Special Supplemental Nutrition Program for Women, Infants, and Children

**Appendix Exhibit A5. Full Regression Output for FVNL Spending (\$) in Weighted Sample**

|                                   | <b>Estimate</b> | <b>Standard Error</b> | <b>P</b> | <b>Lower 95% CI</b> | <b>Upper 95% CI</b> |
|-----------------------------------|-----------------|-----------------------|----------|---------------------|---------------------|
| Intercept                         | 8.6847          | 0.2335                | <0.001   | 8.2271              | 9.1422              |
| Healthy Helping Enrollment        | -1.6369         | 0.1405                | <0.001   | -1.9123             | -1.3614             |
| Time (before or after index date) | -6.3632         | 0.1831                | <0.001   | -6.7220             | -6.0044             |
| Time*Healthy Helping Enrollment   | 26.9447         | 0.2148                | <0.001   | 26.5238             | 27.3656             |
| Month and Year of Observation     |                 |                       |          |                     |                     |
| October 2019 (Ref)                | 0.0000          | 0.0000                | 0.000    | 0.0000              | 0.0000              |
| November 2019                     | 1.4840          | 0.1221                | <0.001   | 1.2446              | 1.7234              |
| December 2019                     | 0.0153          | 0.1206                | 0.899    | -0.2210             | 0.2517              |
| January 2020                      | 0.2782          | 0.1278                | 0.029    | 0.0278              | 0.5286              |
| February 2020                     | 0.3709          | 0.1342                | 0.006    | 0.1079              | 0.6340              |
| March 2020                        | 3.8141          | 0.1416                | <0.001   | 3.5365              | 4.0916              |
| April 2020                        | 6.1921          | 0.1524                | <0.001   | 5.8934              | 6.4908              |
| May 2020                          | 7.1653          | 0.1583                | <0.001   | 6.8550              | 7.4756              |
| June 2020                         | 7.4701          | 0.1522                | <0.001   | 7.1718              | 7.7683              |
| July 2020                         | 7.8054          | 0.1452                | <0.001   | 7.5208              | 8.0900              |
| August 2020                       | 5.3558          | 0.1500                | <0.001   | 5.0617              | 5.6499              |
| September 2020                    | 7.8492          | 0.1765                | <0.001   | 7.5033              | 8.1951              |
| October 2020                      | 10.0143         | 0.2643                | <0.001   | 9.4963              | 10.5322             |
| November 2020                     | 10.2102         | 0.2752                | <0.001   | 9.6707              | 10.7496             |
| December 2020                     | 16.0053         | 0.2845                | <0.001   | 15.4476             | 16.5630             |
| Follow-up time, months            | 2.6611          | 0.0486                | <0.001   | 2.5658              | 2.7564              |
| WIC Use (Past 3 mos.)             | 8.2771          | 0.1661                | <0.001   | 7.9516              | 8.6027              |
| Urbanicity                        |                 |                       |          |                     |                     |
| Urban                             | 0.0000          | 0.0000                | 0.0000   | 0.0000              | 0.0000              |
| Suburban                          | -1.5038         | 0.3201                | <0.001   | -2.1312             | -0.8764             |
| Rural                             | -1.6581         | 0.2895                | <0.001   | -2.2255             | -1.0907             |

Source: Authors' analysis of data from a supermarket chain in North Carolina, October 2019 to December 2020.

Notes: Models include data from 19,722 Healthy Helping enrollees (208,601 shopper-months) and 86,034 control shoppers (804,481 shopper-months). Estimates presented are from a linear mixed model with the above terms. Models include random intercepts for most frequent store and shopper ID.

Abbreviations: CI = Confidence Interval; WIC = Special Supplemental Nutrition Program for Women, Infants, & Children

**Appendix Exhibit A6.** Sensitivity Analysis of Changes in Spending among Healthy Helping Enrollees Relative to Controls (Unweighted)

| <b>Variable</b>                                                    | <b>Estimate</b> | <b>95% CI</b> | <b>P</b> |
|--------------------------------------------------------------------|-----------------|---------------|----------|
| Total Spending (\$/month)                                          | 54.32           | 52.98, 55.65  | <0.001   |
| Food and Beverage (FB) Spending                                    |                 |               |          |
| Dollars Spent (\$/month)                                           | 52.51           | 51.30, 53.71  | <0.001   |
| Fruits, Vegetables, Nuts & Legumes                                 |                 |               |          |
| Dollars Spent (\$/month)                                           | 27.20           | 27.00, 27.40  | <0.001   |
| Relative Share of FB Spending (%)                                  | 13.80           | 13.68, 13.91  | <0.001   |
| Volume (oz)                                                        | 241.6           | 239.7, 243.4  | <0.001   |
| Fruits, Vegetables, Nuts, & Legumes w/No Added Sugar, Salt, or Fat |                 |               |          |
| Dollars Spent (\$/month)                                           | 25.74           | 25.57, 25.91  | <0.001   |
| Relative Share of FB Spending (%)                                  | 13.69           | 13.58, 13.80  | <0.001   |
| Candy, Chocolate & Gum (CCG)                                       |                 |               |          |
| Dollars Spent (\$/month)                                           | 0.45            | 0.41, 0.50    | <0.001   |
| Relative Share of FB Spending (%)                                  | -0.17           | -0.21, -0.12  | <0.001   |
| Dessert & Sweet Snacks                                             |                 |               |          |
| Dollars Spent (\$/month)                                           | 2.42            | 2.27, 2.57    | <0.001   |
| Relative Share of FB Spending (%)                                  | -1.68           | -1.78, -1.58  | <0.001   |
| Processed Meats & Seafood                                          |                 |               |          |
| Dollars Spent (\$/month)                                           | 2.58            | 2.42, 2.75    | <0.001   |
| Relative Share of FB Spending (%)                                  | -1.44           | -1.53, -1.36  | <0.001   |
| Salty Snacks                                                       |                 |               |          |
| Dollars Spent (\$/month)                                           | 1.45            | 1.34, 1.56    | <0.001   |
| Relative Share of FB Spending (%)                                  | -0.90           | -0.97, -0.83  | <0.001   |
| Sugar-Sweetened Beverages                                          |                 |               |          |
| Dollars Spent (\$/month)                                           | 2.54            | 2.34, 2.74    | <0.001   |
| Relative Share of FB Spending (%)                                  | -2.52           | -2.64, -2.39  | <0.001   |
| Sweeteners & Toppings                                              |                 |               |          |
| Dollars Spent (\$/month)                                           | 0.29            | 0.26, 0.32    | <0.001   |
| Relative Share of FB Spending (%)                                  | -0.19           | -0.22, -0.16  | <0.001   |

Source: Authors' analysis of data from a supermarket chain in North Carolina, October 2019 to December 2020.

Notes: Models include data from 28,898 Healthy Helping enrollees (236,714 shopper-months) and 162,748 control shoppers (1,024,942 shopper-months). Estimates are from linear mixed models with terms for Healthy Helping (1/0), time (before HH = 0, during = 1) and a HH-by-time product term. Models are also adjusted for month and year, WIC use, urbanicity of most frequent store, and duration of follow-up, with the shopper-month as the unit of analysis. Models include random intercepts for most frequent store and shopper ID.

1. McGuire S. Scientific report of the 2015 dietary guidelines advisory committee. Washington, dc: Us departments of agriculture and health and human services, 2015. *Adv Nutr.* 2016;7(1):202-4.
2. Poti JM, Mendez MA, Ng SW, Popkin BM. Is the degree of food processing and convenience linked with the nutritional quality of foods purchased by US households? *Am J Clin Nutr.* 2015;101(6):1251-62.
3. NC House Bill 1043: 2020 COVID-19 Recovery Act, (2020).
